# Supplementary material for: Feasibility of Invasive Brown Seaweed Rugulopteryx okamurae as Source of Alginate: Characterization of Products and Evaluation of Derived Gels
Source: MDPI journal article supplement (doi:10.3390/polym16050702), 2024-03-05
Supplement: s1 [file s1]

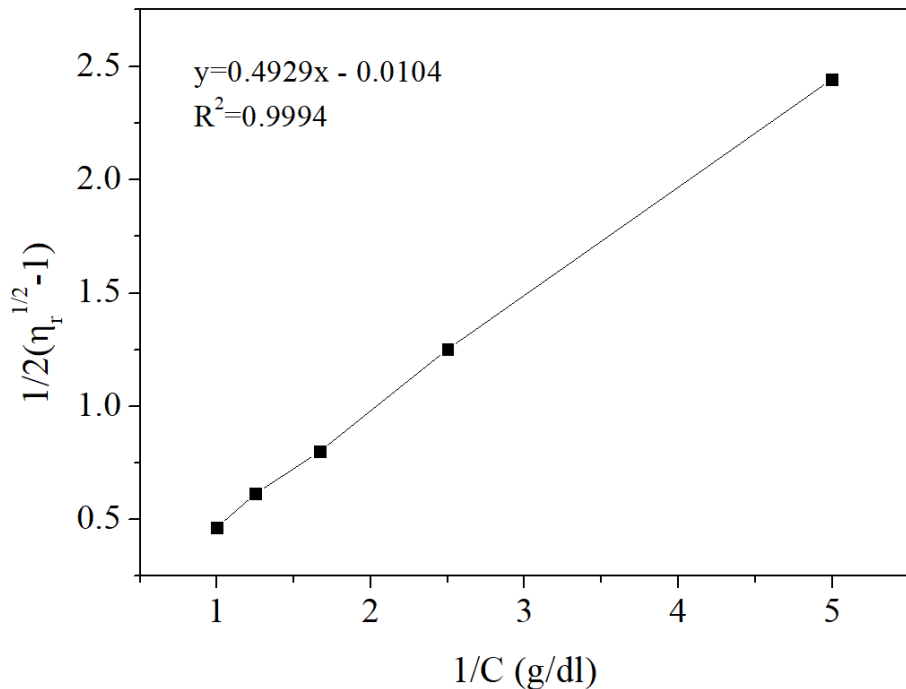

**Figure S1.** Correlation between viscosity and the inverse of concentration for RO-extracted alginate solutions at different concentrations following Fedors' Equation (1).
